# Supplementary material for: Quantitative capabilities of four state-of-the-art SPECT-CT cameras
Source: PubMed Central journal article supplement (PMC3469367; doi:10.1186/2191-219x-2-45), 2012-08-27

**Supplementary Figure 6. Contrast recovery in function of the number of iterations for Philips Brightview XCT.** Reconstructions were performed with Philips Astonish including attenuation and scatter correction and resolution recovery and eight subsets. (A, B) Hot rods. (C, D) Cold rods. (A, C) Full ROI. (B, D) Half ROI.

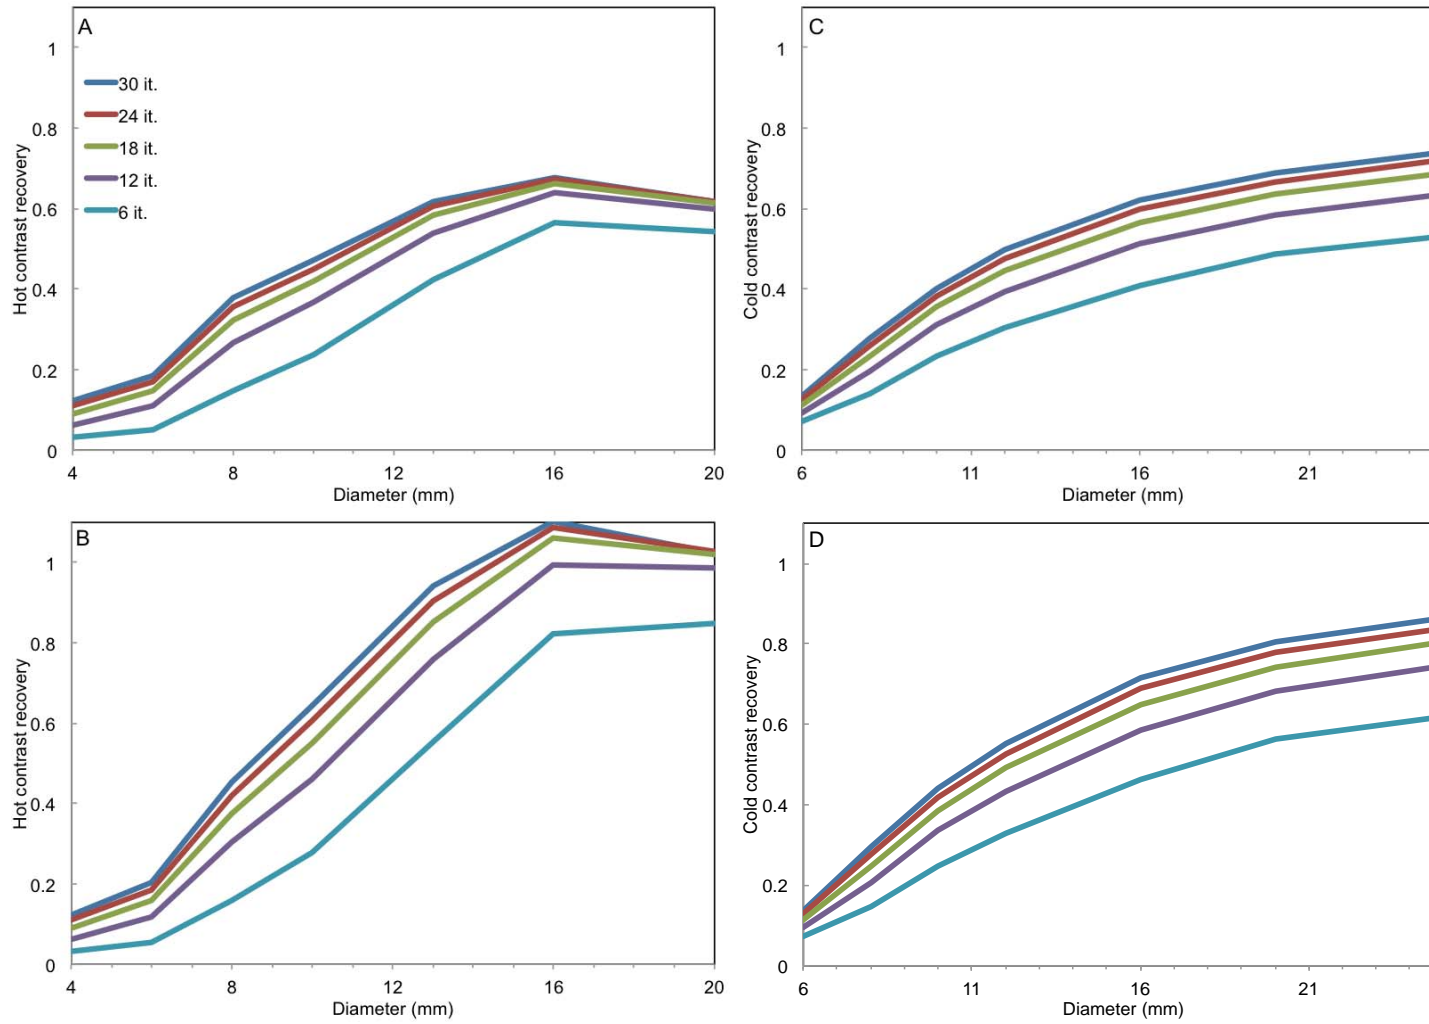

Supplement: 2191-219X-2-45-S3.pdf [file 2191-219X-2-45-S3.pdf]
