# Supplementary material for: Quantitative capabilities of four state-of-the-art SPECT-CT cameras
Source: PubMed Central journal article supplement (PMC3469367; doi:10.1186/2191-219x-2-45), 2012-08-27

**Supplementary Figure 7. Contrast recovery in function of the number of iterations for General Electric Discovery NM/CT670.** Reconstructions were performed with General Electric Evolution for Bone including attenuation and scatter correction and resolution recovery and eight subsets. (A, B) Hot rods. (C, D) Cold rods. (A, C) Full ROI. (B, D) Half ROI.

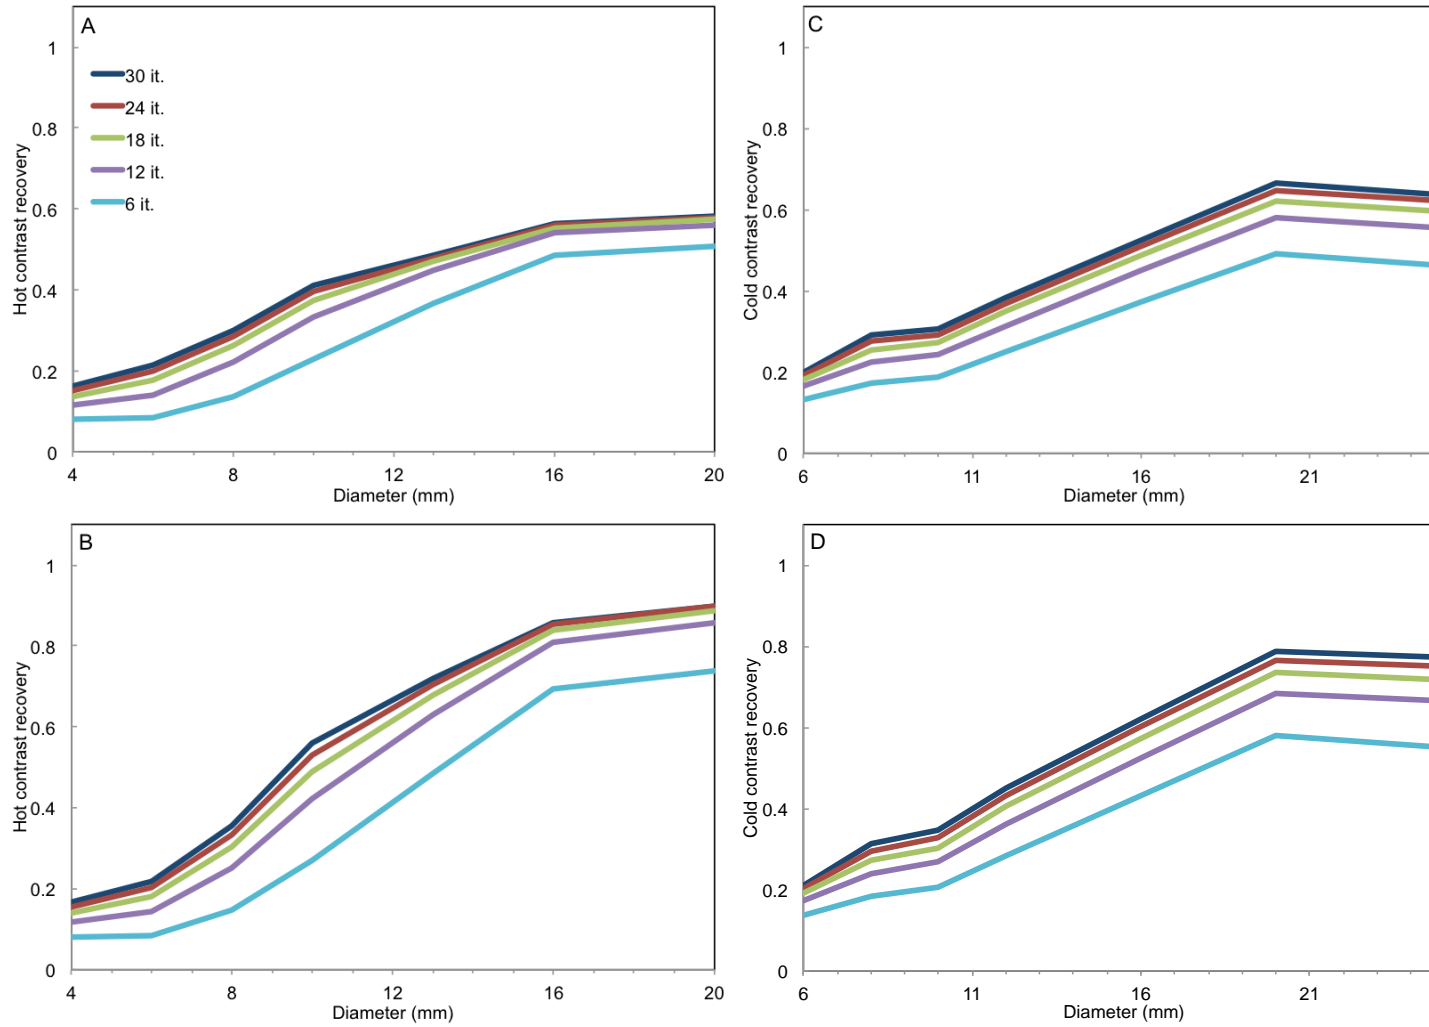

Supplement: 2191-219X-2-45-S4.pdf [file 2191-219X-2-45-S4.pdf]
